# Supplementary material for: The influence of management practices on plant diversity: a comparative study of three urban wetlands in an expanding city in eastern China
Source: PeerJ. 2024 Jan 4;12:e16701. doi: 10.7717/peerj.16701 (PMC10771763; doi:10.7717/peerj.16701)
Supplement: Supplemental Information 3 [file peerj-12-16701-s003.xlsx]

## Sheet: Figure 4
	Family	Genus	Species
XX	104	254	336
QSH	74	150	179
TJH	57	96	112
