# Supplementary material for: The influence of management practices on plant diversity: a comparative study of three urban wetlands in an expanding city in eastern China
Source: PeerJ. 2024 Jan 4;12:e16701. doi: 10.7717/peerj.16701 (PMC10771763; doi:10.7717/peerj.16701)
Supplement: Supplemental Information 4 [file peerj-12-16701-s004.xlsx]

## Sheet: Figure 5
	XX	QSH	TJH
Asteraceae	36	16	7
Rosaceae	23	15	9
Poaceae	20	12	6
Oleaceae	9	7	6
Caryophyllaceae	8	5	4
Brassicaceae	7	7	4
Apiaceae	7	7	4
Lamiaceae/Scrophulariaceae	11	5	5
Fabaceae/Iridaceae	15	8	3
Cyperaceae/Liliaceae	7	6	5
