# Supplementary material for: The influence of management practices on plant diversity: a comparative study of three urban wetlands in an expanding city in eastern China
Source: PeerJ. 2024 Jan 4;12:e16701. doi: 10.7717/peerj.16701 (PMC10771763; doi:10.7717/peerj.16701)
Supplement: Supplemental Information 5 [file peerj-12-16701-s005.xlsx]

## Sheet: Figure 6
	XX-QSH	XX-TJH	QSH-TJH
Jaccard	0.343	0.234	0.259
βws	0.491	0.621	0.581
