# Supplementary material for: The influence of management practices on plant diversity: a comparative study of three urban wetlands in an expanding city in eastern China
Source: PeerJ. 2024 Jan 4;12:e16701. doi: 10.7717/peerj.16701 (PMC10771763; doi:10.7717/peerj.16701)
Supplement: Supplemental Information 6 [file peerj-12-16701-s006.xlsx]

## Sheet: Figure 7
	XX	QSH	TJH
Cosmopolitan	38	29	19
Pantropic	39	21	14
Trop.Asia & Trop.Amer.disjuncted	8	3	3
Old World Tropics	9	3	4
Tropical Asia & Trop. Australasis	9	4	2
Trop.Asia to Trop. Africa	3	2	1
Trop.Asia	13	8	2
North Temperate	46	32	18
E.Asia & N.Amer.disjuncted	16	10	5
Old World Temperate	26	14	13
Temp.Asia	5	5	2
Mediterranea,W.Asia to C.Asia	5	2	1
C. Asia	1	1	0
E.Asia	20	10	6
Endemic to China	5	0	3
