# Supplementary material for: The influence of management practices on plant diversity: a comparative study of three urban wetlands in an expanding city in eastern China
Source: PeerJ. 2024 Jan 4;12:e16701. doi: 10.7717/peerj.16701 (PMC10771763; doi:10.7717/peerj.16701)
Supplement: Supplemental Information 7 [file peerj-12-16701-s007.xlsx]

## Sheet: Figure 8
	XX	QSH	TJH
Invasive plants	12	11	10
Rare and endangered plants	8	1	3
