# Supplementary material for: The influence of management practices on plant diversity: a comparative study of three urban wetlands in an expanding city in eastern China
Source: PeerJ. 2024 Jan 4;12:e16701. doi: 10.7717/peerj.16701 (PMC10771763; doi:10.7717/peerj.16701)
Supplement: Supplemental Information 8 [file peerj-12-16701-s008.xlsx]

## Sheet: Figure 9
Light	XX	QSH	TJH
1	0	0	0
2	0	0	0
3	3	0	0
4	15	9	3
5	43	14	14
6	94	54	34
7	130	65	44
8	51	36	17
9	0	1	0
Temperature	XX	QSH	TJH
1	0	0	0
2	0	0	0
3	4	1	0
4	25	14	7
5	82	43	24
6	107	62	42
7	107	57	33
8	9	2	4
9	2	0	2
Water	XX	QSH	TJH
1	0	0	0
2	0	0	0
3	9	5	4
4	24	17	6
5	149	76	45
6	82	39	33
7	29	16	10
8	25	15	9
9	18	11	5
soil reaction	XX	QSH	TJH
1	0	0	0
2	0	0	0
3	8	3	2
4	20	14	7
5	209	112	73
6	56	26	17
7	36	21	10
8	6	2	2
9	1	1	1
Soil fertility	XX	QSH	TJH
1	0	0	0
2	0	0	0
3	5	3	1
4	13	11	2
5	94	53	30
6	189	95	71
7	34	16	8
8	1	1	0
9	0	0	0
