# Supplementary material for: The influence of management practices on plant diversity: a comparative study of three urban wetlands in an expanding city in eastern China
Source: PeerJ. 2024 Jan 4;12:e16701. doi: 10.7717/peerj.16701 (PMC10771763; doi:10.7717/peerj.16701)
Supplement: Supplemental Information 9 [file peerj-12-16701-s009.xlsx]

## Sheet: Sheet1
Names	Samples		Natrual factors						Artificial factors					Plant diversity
			Pre (mm)	AAT (℃)	Alt(m)	WT (cm)	WSI		HA(y)	CILSD	PSP	ICP		D	H	J
Xixi wetland	1		1399	15.17	3	50	1.07896		18	253.333	49	52		101	4.112	0.453
	2		1399	15.17	4	47	1.20667		18	293.714	50	34		84	4.034	0.429
	3		1399	15.17	4	65	1.1606		18	309.429	49	16		65	3.4164	0.38665
	4		1399	15.17	5	70	1.60725		18	207.111	67	13		80	3.7479	0.3994
	5		1399	15.17	3	50	1.50671		18	228.889	44	27		71	3.5652	0.39445
	6		1399	15.17	4	82	1.78974		18	211.556	51	11		62	3.3339	0.3814
	7		1399	15.17	3	65	1.24756		18	205.778	41	10		51	2.9852	0.35445
	8		1399	15.17	3	60	1.31879		18	232	28	23		51	2.9852	0.35445
	9		1399	15.17	4	70	1.77313		18	241.778	45	32		77	3.6924	0.39865
	10		1399	15.17	4	55	1.31685		18	216.667	38	15		53	3.054	0.36025
	11		1399	15.17	4	66	1.11168		18	212.889	47	20		67	3.4684	0.38965
	12		1399	15.17	5	70	1.1399		18	215.333	37	10		47	2.8404	0.34165
	13		1399	15.17	4	70	1.6311		18	221.111	42	23		65	3.4164	0.38665
	14		1399	15.17	4	59	1.18257		18	234.889	50	13		63	3.362	0.38325
	15		1399	15.17	5	70	1.19427		18	208	54	24		78	3.7115	0.399
	16		1399	15.17	4	50	1.36015		18	231.111	33	7		40	2.5639	0.3154
	17		1399	15.17	4	70	1.27379		18	220	55	17		72	3.5879	0.3954
	18		1399	15.17	1	40	1.17321		18	221.778	1	1		2	0.598	0.091
	19		1399	15.17	2	80	1.15144		18	200	42	0		42	2.6459	0.3234
	20		1399	15.17	2	75	1.34515		18	235.556	43	19		62	3.3339	0.3814
	21		1399	15.17	4	70	1.21291		18	208.444	30	9		39	2.522	0.31125
	22		1399	15.17	2	55	1.11344		18	200	30	25		55	3.25	0.422
	23		1399	15.17	6	50	1.14578		18	226.667	32	12		44	2.7255	0.331
	24		1399	15.17	2	70	1.1094		18	200	42	24		66	3.4427	0.3882
	25		1399	15.17	7	60	1.09276		18	224.444	60	18		78	3.7115	0.399
	26		1399	15.17	6	55	1.2015		18	208.444	49	18		67	3.309	0.386
	27		1399	15.17	7	50	1.08522		18	226.667	39	14		53	3.054	0.36025
	28		1399	15.17	7	65	1.11468		18	210	30	16		46	2.8027	0.3382
	29		1399	15.17	2	75	1.1231		18	217.778	34	14		48	2.8775	0.345
	30		1399	15.17	2	38	1.22199		18	210	28	9		37	2.4364	0.30265
	31		1399	15.17	2	50	1.17559		18	382.222	27	12		39	2.522	0.31125
	32		1399	15.17	4	65	1.06383		18	281.333	47	16		63	3.362	0.38325
	33		1399	15.17	7	75	1.07866		18	227.333	30	17		47	2.8404	0.34165
	34		1399	15.17	6	60	1.16032		18	208	18	16		34	1.78	0.239
	35		1399	15.17	3	79	1.15252		18	213.111	54	19		73	3.61	0.39625
	36		1399	15.17	2	65	1.10606		18	248.444	39	12		51	2.9852	0.35445
	37		1399	15.17	4	55	1.79533		18	277.778	29	12		41	3.193	0.377
	38		1399	15.17	6	77	1.10004		18	225.333	38	15		53	3.054	0.36025
	39		1399	15.17	4	55	1.14001		18	214	46	10		56	3.1527	0.3682
	40		1399	15.17	4	82	1.15414		18	248.889	28	9		37	2.4364	0.30265
Tongjian Lake wetland	1		1454	18	7	38	1.10848		6	219.556	8	4		12	1.1966	0.169488
	2		1454	18	14	55	1.15423		6	231.111	22	32		54	2.6666	0.330123
	3		1454	18	12	35	1.25877		6	225.111	26	20		46	2.6042	0.312999
	4		1454	18	11	45	1.39315		6	227.556	27	34		61	2.767	0.339
	5		1454	18	9	45	1.44195		6	210	30	19		49	2.6396	0.319746
	6		1454	18	8	40	1.53206		6	240.889	23	24		47	2.66	0.313
	7		1454	18	8	48	1.67845		6	208.889	24	25		49	2.6396	0.319746
	8		1454	18	10	55	1.40372		6	239.556	26	22		48	2.6294	0.317544
	9		1454	18	8	30	1.18095		6	234.444	17	13		30	2.1722	0.267348
	10		1454	18	7	35	1.19487		6	222.667	19	24		43	2.5544	0.305796
	11		1454	18	11	30	1.41647		6	230	26	19		45	2.5892	0.310652
	12		1454	18	7	28	1.93733		6	230.667	21	21		42	2.5346	0.303283
	13		1454	18	6	30	1.57692		6	311.111	14	16		30	1.905	0.236
	14		1454	18	7	42	1.47662		6	224.222	6	3		9	0.891	0.124
	15		1454	18	7	20	1.2875		6	241.778	17	18		35	2.3512	0.283811
	16		1454	18	9	24	1.33656		6	317.333	13	10		23	2.243	0.291
	17		1454	18	7	45	1.05247		6	247.111	22	10		32	2.2486	0.274241
	18		1454	18	6	30	1.24996		6	222.222	19	8		27	2.0456	0.256095
	19		1454	18	7	20	1.47049		6	225.556	16	17		33	2.2844	0.277527
	20		1454	18	7	25	1.59454		6	200	13	13		21	1.7492	0.229255
Qingshan Lake wetland	1		1427	15.9	30	30	1.29945		6	248	31	9		40	2.4059	0.3951
	2		1427	15.9	26	30	1.22511		6	200	5	6		11	0.587	0.082
	3		1427	15.9	28	30	1.666		6	221.778	23	6		29	1.9274	0.28328
	4		1427	15.9	29	15	1.49514		6	220.667	38	10		48	2.6475	0.476348
	5		1427	15.9	32	30	1.04592		6	263.556	28	5		33	2.121	0.323956
	6		1427	15.9	25	35	1.09888		6	209.556	0	1		1	0	0
	7		1427	15.9	29	35	1.08435		6	231.333	0	5		5	0.2954	0.0388875
	8		1427	15.9	37	35	1.07117		6	219.333	11	3		14	1.0019	0.130602
	9		1427	15.9	39	25	1.14732		6	220.667	18	6		24	1.6539	0.232412
	10		1427	15.9	41	35	1.15928		6	220	13	7		20	1.4099	0.1917
	11		1427	15.9	28	30	1.21666		6	226.667	17	11		28	1.8755	0.273108
	12		1427	15.9	31	32	1.79231		6	240	32	8		40	2.767	0.31
	13		1427	15.9	31	35	1.58949		6	220.444	26	7		33	2.121	0.323956
	14		1427	15.9	32	38	1.5261		6	225.778	20	4		24	1.6539	0.232412
	15		1427	15.9	27	50	1.19762		6	200	35	8		43	2.507	0.425575
	16		1427	15.9	32	45	1.14158		6	221.333	45	20		65	2.997	0.35
	17		1427	15.9	29	31	1.31876		6	232	0	1		1	0	0
	18		1427	15.9	26	42	1.30317		6	208	20	13		33	2.121	0.323956
	19		1427	15.9	30	22	1.19903		6	200	18	6		24	1.6539	0.232412
	20		1427	15.9	31	30	1.48596		6	216.667	35	12		47	2.439	0.277
	21		1427	15.9	32	25	1.10245		6	216.667	27	4		31	2.027	0.303619
